# Supplementary material for: Re-Irradiation for Locally Recurrent Lung Cancer: A Single Center Retrospective Analysis
Source: MDPI journal article supplement (doi:10.3390/curroncol28030170), 2021-05-13
Supplement: s1 [file s1]

## Article

# Re-Irradiation for Locally Recurrent Lung Cancer: A Single Center Retrospective Analysis

Brane Grambozov, Evelyn Nussdorfer, Julia Kaiser, Sabine Gerum, Gerd Fastner, Markus Stana, Christoph Gaisberger, Romana Wass Michael Studnicka, Felix Sedlmayer and Franz Zehentmayr

**Table S1.** Prognostic and predictive parameters related to overall survival.

| Uni- and Multivariate Analysis (Cox Regression) |                                    |       |       |
|-------------------------------------------------|------------------------------------|-------|-------|
| Variable                                        |                                    | UVA   | MVA   |
| Patient characteristics                         | Age                                | 0.563 | n.s.  |
|                                                 | Sex                                | 0.250 | n.s.  |
|                                                 | Weight loss                        | 0.677 | n.s.  |
|                                                 | ECOG                               | 0.137 | n.s.  |
|                                                 | Histology                          | 0.205 | n.s.  |
|                                                 | T-stage                            | 0.592 | n.s.  |
|                                                 | N-stage                            | 0.125 | n.s.  |
|                                                 | M-stage                            | 0.015 | n.s.  |
|                                                 | FEV1                               | 0.526 | n.s.  |
|                                                 | COPD                               | 0.733 | n.s.  |
| Charlson Comorbidity Index                      |                                    | 0.684 | n.s.  |
| Treatment related factors                       | Re-Irradiation volume              | 0.000 | 0.000 |
|                                                 | Tumor location                     | 0.070 | n.s.  |
|                                                 | Cumulative EQD <sub>2</sub>        | 0.082 | n.s.  |
|                                                 | Interval between radiation courses | 0.553 | n.s.  |
|                                                 | V20 <sub>total lung</sub>          | 0.427 | n.s.  |
|                                                 | V25 <sub>heart</sub>               | 0.936 | n.s.  |
|                                                 | Local control                      | 0.005 | n.s.  |
|                                                 | Systemic treatment                 | 0.497 | n.s.  |

EQD<sub>2</sub>: biologically equivalent dose in 2 Gy fractions; MVA: multivariate analysis; UVA: univariate analysis; V20<sub>total lung</sub>: Total lung volume that receives 20 Gy or more; V25<sub>heart</sub>: Heart volume that receives 25 Gy or more.

**Table S2.** Doses to organs at risk in both radiation courses except for V20<sub>total lung</sub> and V25<sub>heart</sub>, which are given at the end of table 1 “Treatment”.

| Cumulative Dose to Organs at Risk |        |        |
|-----------------------------------|--------|--------|
| V25 total lung (%)                | median | 21     |
|                                   | range  | 2–38   |
| Mean lung dose (Gy)               | median | 15     |
|                                   | range  | 3–24   |
| Mean esophageal dose (Gy)         | median | 24.6   |
|                                   | range  | 2–48   |
| Dmax to central vessels (Gy)      | median | 70     |
|                                   | range  | 19–136 |
| Dmax to spinal cord (Gy)          | median | 48     |
|                                   | range  | 12–69  |
